# Supplementary material for: Organizational-Level Strategies With or Without an Activity Tracker to Reduce Office Workers’ Sitting Time: Rationale and Study Design of a Pilot Cluster-Randomized Trial
Source: PubMed Central journal article supplement (PMC4909392; doi:10.2196/resprot.5438), 2016-05-25
Supplement: resprot_v5i2e73_app1.pdf [file resprot_v5i2e73_app1.pdf]

## Multimedia Appendix 1: questionnaire items created or modified for study

| Organisational support program evaluation questions                                                                                                                                                                                                                                                                         | Response options                                                                                                                             | Source    |
|-----------------------------------------------------------------------------------------------------------------------------------------------------------------------------------------------------------------------------------------------------------------------------------------------------------------------------|----------------------------------------------------------------------------------------------------------------------------------------------|-----------|
| <b>How many Stand Up, Sit Less, Move More emails do you recall receiving from [the Head of Workplace Wellbeing] over the duration of the ‘Stand Up Lend Lease’ program?</b>                                                                                                                                                 | 0-7 (indicates total number of emails)                                                                                                       | Q 3M      |
| <b>When you received a Stand Up, Sit Less, Move More email from [the Head of Workplace Wellbeing] what did you normally do with it?</b>                                                                                                                                                                                     | 1 = Read it then delete it<br>2 = Read it then store it to look at later<br>3 = Leave it and not read it<br>4 = Delete it without reading it | Q 3M      |
| <b>How supportive were the following parties at supporting you to Stand Up, Sit Less or Move More?</b>                                                                                                                                                                                                                      | 1 = Not supportive<br>2 = Somewhat supportive<br>3 = Not sure<br>4 = Supportive<br>5 = Extremely supportive                                  | Q 3M, 12M |
| <ul style="list-style-type: none"> <li>• your organisation?</li> <li>• your main manager?</li> <li>• your colleagues?</li> </ul>                                                                                                                                                                                            |                                                                                                                                              |           |
| <i>*limited to the past 6 months for 12 month Q</i>                                                                                                                                                                                                                                                                         |                                                                                                                                              |           |
| <b>How useful were the Stand Up, Sit Less, Move More emails and tips for helping you to:</b>                                                                                                                                                                                                                                | 1 = Not at all useful<br>2 = Somewhat useful<br>3 = Not sure<br>4 = Useful<br>5 = Extremely useful                                           | Q 3M      |
| <ul style="list-style-type: none"> <li>• reduce your sitting</li> <li>• increase your sit to stand transitions or "Stand Ups"</li> <li>• increase your standing</li> <li>• increase your step count</li> <li>• increase your incidental activity</li> <li>• increase your moderate to vigorous physical activity</li> </ul> |                                                                                                                                              |           |
| <b>Overall, how would you rate your satisfaction with the Stand Up, Sit Less, Move More emails and information you received?</b>                                                                                                                                                                                            | 1 = Not at all satisfied<br>2 = Somewhat satisfied<br>3 = Not sure<br>4 = Satisfied<br>5 = Extremely satisfied                               | Q 3M      |
| <b>Overall, how would you rate your satisfaction with</b>                                                                                                                                                                                                                                                                   | Free text                                                                                                                                    | Q 3M      |

**the Stand Up, Sit Less, Move More emails and information you received?**

**Have you experienced any discomfort or injury as a result of your study participation?** 1 = Yes Q 3M,  
2 = No 12M

**Have you experienced any discomfort or injury as a result of your study participation?** Free text Q 3M,  
12M

**Are there any other comments you would like to make about the 'Stand Up Lend Lease' program?** Free text Q 3M,  
12M

Q = questionnaire; 3M = 3-month assessment; 12M = 12-month assessment

| LUMObacK evaluation questions                                                                                                                                                                                                                                                                                                                                       | Response options                                                                                                                                                                                  | Source              |
|---------------------------------------------------------------------------------------------------------------------------------------------------------------------------------------------------------------------------------------------------------------------------------------------------------------------------------------------------------------------|---------------------------------------------------------------------------------------------------------------------------------------------------------------------------------------------------|---------------------|
| <b>Have you ever used a LUMObacK posture sensor device?</b>                                                                                                                                                                                                                                                                                                         | 1 = Yes<br>2 = No<br>3 = Given, but never used (asked at 3-months only)                                                                                                                           | Q BL,<br>3M,<br>12M |
| <b>When did you first start using the LUMObacK posture sensor device?</b>                                                                                                                                                                                                                                                                                           | date                                                                                                                                                                                              | Q BL,<br>3M,<br>12M |
| <b>Please describe your usage of the LUMObacK device in the past 6 months.</b>                                                                                                                                                                                                                                                                                      | 1 = Have worn in the past week<br>2 = Have worn in the past month, but not in the past week<br>3 = Have worn in the past 6 months, but not in the past month<br>4 = Not worn in the past 6 months | Q 12M               |
| <b>Did you ever wear your LUMObacK:</b>                                                                                                                                                                                                                                                                                                                             | 1 = Yes<br>2 = No<br>3 = Not applicable [(2) only]                                                                                                                                                | Q 3M                |
| <ul style="list-style-type: none"> <li>• (1) at a Lend Lease workplace (includes your usual office and other Lend Lease sites)?</li> <li>• (2) while working for Lend Lease from locations other than a Lend Lease workplace (such as from home or at an external conference)?</li> <li>• (3) outside of work (e.g., commuting or in your leisure time)?</li> </ul> |                                                                                                                                                                                                   |                     |
| <b>Thinking about when you wore your LUMObacK, how often did you wear your LUMObacK:</b>                                                                                                                                                                                                                                                                            | 1 = Rarely<br>2 = Sometimes<br>3 = Often                                                                                                                                                          | Q 3M                |
| <ul style="list-style-type: none"> <li>• while at a Lend Lease workplace (includes your usual office and other Lend Lease sites)?</li> <li>• while working for Lend Lease from locations other than a Lend Lease workplace (such as from home or at an external conference)?</li> <li>• outside of work?</li> </ul>                                                 |                                                                                                                                                                                                   |                     |
| <b>What phone or device did you use the LUMObacK with?</b>                                                                                                                                                                                                                                                                                                          | 1 = iPhone<br>2 = iPad<br>3 = Android phone<br>4 = N/A never set up LUMObacK with phone or device                                                                                                 | Q 3M                |

|                                                                                                                                                             |                                |           |
|-------------------------------------------------------------------------------------------------------------------------------------------------------------|--------------------------------|-----------|
|                                                                                                                                                             | 5 = other                      |           |
| <b>On days when you wore your LUMObacK, how often did you check the LUMObacK app on average?</b>                                                            | 1 = More than 10 times per day | Q 3M, 12M |
| <i>*limited to the past 6 months for 12 month Q</i>                                                                                                         | 2 = 5-10 times per day         |           |
|                                                                                                                                                             | 3 = 2-4 times per day          |           |
|                                                                                                                                                             | 4 = Once per day               |           |
|                                                                                                                                                             | 5 = Less than once a day       |           |
|                                                                                                                                                             | 6 = Never                      |           |
| <b>When using the LUMObacK app, how often did you notice or check your goals? [goals include those set by you or the default goals created by LUMObacK]</b> | 1 = Never                      | Q 3M, 12M |
| <i>*limited to the past 6 months for 12 month Q</i>                                                                                                         | 2 = Rarely                     |           |
|                                                                                                                                                             | 3 = Sometimes                  |           |
|                                                                                                                                                             | 4 = Often                      |           |
|                                                                                                                                                             | 5 = Very often                 |           |
|                                                                                                                                                             | 6 = All the time               |           |
| <b>When wearing your LUMObacK, how often did you re-calibrate the LUMObacK device?</b>                                                                      | 1 = Never                      | Q 3M      |
|                                                                                                                                                             | 2 = Rarely                     |           |
|                                                                                                                                                             | 3 = Sometimes                  |           |
|                                                                                                                                                             | 4 = Often                      |           |
|                                                                                                                                                             | 5 = Very often                 |           |
| <b>When wearing your LUMObacK, how often did you: have it set to vibrate</b>                                                                                | 1 = Never                      | Q 3M, 12M |
| <i>*limited to the past 6 months for 12 month Q</i>                                                                                                         | 2 = Rarely                     |           |
|                                                                                                                                                             | 3 = Sometimes                  |           |
|                                                                                                                                                             | 4 = Often                      |           |
|                                                                                                                                                             | 5 = Very often                 |           |
|                                                                                                                                                             | 6 = All the time               |           |
| <b>When wearing your LUMObacK, how often did you: have a sitting alert notification enabled</b>                                                             | 1 = Never                      | Q 3M, 12M |
| <i>*limited to the past 6 months for 12 month Q</i>                                                                                                         | 2 = Rarely                     |           |
|                                                                                                                                                             | 3 = Sometimes                  |           |
|                                                                                                                                                             | 4 = Often                      |           |
|                                                                                                                                                             | 5 = Very often                 |           |
|                                                                                                                                                             | 6 = All the time               |           |
| <b>When you used the vibration feature did you mostly set the LUMObacK to:</b>                                                                              | 1 = Pulse                      | Q 3M      |
| <ul style="list-style-type: none"> <li>• pulse: the sensor buzzes gently until you move</li> </ul>                                                          | 2 = Buzz once                  |           |

|                                                                                                                                                                                                                                                                                   |                                                                                                                                                                                                                      |             |
|-----------------------------------------------------------------------------------------------------------------------------------------------------------------------------------------------------------------------------------------------------------------------------------|----------------------------------------------------------------------------------------------------------------------------------------------------------------------------------------------------------------------|-------------|
| <p><b>into good posture</b></p> <ul style="list-style-type: none"> <li>• <b>or to buzz once: the sensor vibrates once, each time you move into bad posture?</b></li> </ul>                                                                                                        | <p>3 = I used a combination</p> <p>4 = Not sure</p>                                                                                                                                                                  |             |
| <p><b>When you used the sitting alert notification did you mostly set it to alert every:</b></p>                                                                                                                                                                                  | <p>1 = 15 mins</p> <p>2 = 30 mins</p> <p>3 = 45 mins</p> <p>4 = 1 hr</p> <p>5 = 2 hrs</p>                                                                                                                            | <p>Q 3M</p> |
| <p><b>What learning videos did you watch in the app? (Please select all that apply)</b></p>                                                                                                                                                                                       | <p>Sitting Posture</p> <p>Standing Posture</p> <p>Chest Stretch</p> <p>Pec Stretch</p> <p>Desk Prone Stretch</p> <p>Pivot Prone Stretch</p> <p>Cervical AROM Retraction</p> <p>Did not watch any learning videos</p> | <p>Q 3M</p> |
| <p><b>How comfortable was the LUMObac device to wear?</b></p>                                                                                                                                                                                                                     | <p>1 = Not at all comfortable</p> <p>2 = Somewhat comfortable</p> <p>3 = Not sure</p> <p>4 = Comfortable</p> <p>5 = Extremely comfortable</p>                                                                        | <p>Q 3M</p> |
| <p><b>How easy was it to:</b></p> <ul style="list-style-type: none"> <li>• <b>set up the LUMObac device and app</b></li> <li>• <b>use and navigate the LUMObac app</b></li> <li>• <b>calibrate the LUMObac device</b></li> </ul>                                                  | <p>1 = Not at all easy</p> <p>2 = Somewhat easy</p> <p>3 = Not sure</p> <p>4 = Easy</p> <p>5 = Extremely easy</p>                                                                                                    | <p>Q 3M</p> |
| <p><b>How useful were the LUMObac and the LUMObac app for helping you to:</b></p> <ul style="list-style-type: none"> <li>• <b>reduce your sitting</b></li> <li>• <b>increase your sit to stand transitions or "Stand Ups"</b></li> <li>• <b>increase your standing</b></li> </ul> | <p>1 = Not at all useful</p> <p>2 = Somewhat useful</p> <p>3 = Not sure</p> <p>4 = Useful</p> <p>5 = Extremely useful</p>                                                                                            | <p>Q 3M</p> |

- increase your step count
- improve your posture
- improve your sleep
- increase your incidental activity
- increase your moderate to vigorous physical activity

**How useful were the vibrations for:** 1 = Not at all useful Q 3M

- reducing your sitting 2 = Somewhat useful
  - making you aware of your posture 3 = Not sure
  - motivating you to improve your posture 4 = Useful
- 5 = Extremely useful

**How useful were the sitting alerts for:** 1 = Not at all useful Q 3M

- making you aware of your sitting 2 = Somewhat useful
  - motivating you to reduce your sitting 3 = Not sure
  - motivating you to increase your sit to stand transitions or "Stand Ups" 4 = Useful
- 5 = Extremely useful

**In the LUMOback app, how useful was the stick figure avatar at helping you to:** 1 = Not at all useful Q 3M

- correct your posture 2 = Somewhat useful
  - reduce your sitting 3 = Not sure
- 4 = Useful
- 5 = Extremely useful
- 6 = Did not notice/use

**In the LUMOback app, how useful were the goals for helping you to:** 1 = Not at all useful Q 3M

- reduce your sitting 2 = Somewhat useful
  - increase your sit to stand transitions or "Stand Ups" 3 = Not sure
  - increase your step count 4 = Useful
  - improve your posture 5 = Extremely useful
- 6 = Did not notice/use

**How satisfied did you feel when achieving either your own or the LUMOback goal?** 1 = Not at all satisfied Q 3M

- 2 = Somewhat satisfied
- 3 = Not sure
- 4 = Satisfied

|                                                                                                                                                                                                                                                          |                                  |           |
|----------------------------------------------------------------------------------------------------------------------------------------------------------------------------------------------------------------------------------------------------------|----------------------------------|-----------|
|                                                                                                                                                                                                                                                          | 5 = Extremely satisfied          |           |
|                                                                                                                                                                                                                                                          | 6 = N/A never achieved any goals |           |
| <b>How useful were your LUMObacK graphs and results for making you aware of your:</b>                                                                                                                                                                    | 1 = Not at all useful            | Q 3M      |
| <ul style="list-style-type: none"> <li>• sitting</li> <li>• sit to stand transitions or "Stand Ups"</li> <li>• standing</li> <li>• step count</li> <li>• posture</li> </ul>                                                                              | 2 = Somewhat useful              |           |
|                                                                                                                                                                                                                                                          | 3 = Not sure                     |           |
|                                                                                                                                                                                                                                                          | 4 = Useful                       |           |
|                                                                                                                                                                                                                                                          | 5 = Extremely useful             |           |
|                                                                                                                                                                                                                                                          | 6 = Did not notice/use           |           |
| <b>How motivating were your LUMObacK graphs and results for:</b>                                                                                                                                                                                         | 1 = Not at all motivating        | Q 3M      |
| <ul style="list-style-type: none"> <li>• reducing your sitting</li> <li>• increasing your sit to stand transitions or "Stand Ups"</li> <li>• increasing your standing</li> <li>• increasing your step count</li> <li>• improving your posture</li> </ul> | 2 = Somewhat motivating          |           |
|                                                                                                                                                                                                                                                          | 3 = Not sure                     |           |
|                                                                                                                                                                                                                                                          | 4 = Motivating                   |           |
|                                                                                                                                                                                                                                                          | 5 = Extremely motivating         |           |
|                                                                                                                                                                                                                                                          | 6 = Did not notice/use           |           |
| <b>When wearing your LUMObacK how often did you:</b>                                                                                                                                                                                                     | 1 = Never                        | Q 3M      |
| <ul style="list-style-type: none"> <li>• share or compare your LUMObacK graphs and results with your co-workers?</li> <li>• share your LUMObacK graphs and results with your family or friends?</li> </ul>                                               | 2 = Rarely                       |           |
|                                                                                                                                                                                                                                                          | 3 = Sometimes                    |           |
|                                                                                                                                                                                                                                                          | 4 = Often                        |           |
|                                                                                                                                                                                                                                                          | 5 = Very often                   |           |
| <b>How likely do you see yourself using the LUMObacK in the next 6 months?</b>                                                                                                                                                                           | 1 = Very unlikely                | Q 3M, 12M |
|                                                                                                                                                                                                                                                          | 2 = Unlikely                     |           |
|                                                                                                                                                                                                                                                          | 3 = Not sure                     |           |
|                                                                                                                                                                                                                                                          | 4 = Likely                       |           |
|                                                                                                                                                                                                                                                          | 5 = Very likely                  |           |
| <b>Would you recommend the LUMObacK to a friend?</b>                                                                                                                                                                                                     | 1 = Yes                          | Q 3M      |
|                                                                                                                                                                                                                                                          | 2 = No                           |           |
| <b>Did you have any adverse experiences from using the LUMObacK?</b>                                                                                                                                                                                     | 1 = Yes                          | Q 3M, 12M |
|                                                                                                                                                                                                                                                          | 2 = No                           |           |
| <b>Did you have any adverse experiences from using the LUMObacK?</b>                                                                                                                                                                                     | Text                             | Q 3M, 12M |

**Are there any other comments you would like to make about the LUMObacK and/or the LUMObacK app?** Text

Q 3M,  
12M

Q = questionnaire; BL = baseline; 3M = 3-month assessment; 12M = 12-month assessment



| Workplace strategy use                                                                                                                                                                                                                                                                                                                                                                                                                                                                                                                                                                                                                                                                                                                                                                                                                                                                                                                                                                                                                                                                                                                                                                                                                                                                                                                                         | Response options | Source              |
|----------------------------------------------------------------------------------------------------------------------------------------------------------------------------------------------------------------------------------------------------------------------------------------------------------------------------------------------------------------------------------------------------------------------------------------------------------------------------------------------------------------------------------------------------------------------------------------------------------------------------------------------------------------------------------------------------------------------------------------------------------------------------------------------------------------------------------------------------------------------------------------------------------------------------------------------------------------------------------------------------------------------------------------------------------------------------------------------------------------------------------------------------------------------------------------------------------------------------------------------------------------------------------------------------------------------------------------------------------------|------------------|---------------------|
| <b>In the past month I have:</b>                                                                                                                                                                                                                                                                                                                                                                                                                                                                                                                                                                                                                                                                                                                                                                                                                                                                                                                                                                                                                                                                                                                                                                                                                                                                                                                               | 1 = Never        | Q BL,<br>3M,<br>12M |
| <ul style="list-style-type: none"> <li>• <b>stood up during a meeting</b></li> <li>• <b>stood up when talking on the phone</b></li> <li>• <b>walked to talk to a colleague rather than sending them an email or phoning</b></li> <li>• <b>walked to the printer that is further away from my office</b></li> <li>• <b>walked to the bathroom that is further away from my office</b></li> <li>• <b>walked to a centrally located bin instead of using my own bin</b></li> <li>• <b>attended a meeting where the chairperson indicated that it was acceptable to stand</b></li> <li>• <b>noticed signage around the office to encourage standing up, sitting less and moving more</b></li> <li>• <b>used prompts at my desk (such as postcards and stickers) to remind me to stand up regularly</b></li> <li>• <b>used computer break software or computer prompts to remind me to stand up regularly</b></li> <li>• <b>eaten my lunch away from my desk</b></li> <li>• <b>used the stairs instead of taking the lift</b></li> <li>• <b>cycled to work</b></li> <li>• <b>walked to work</b></li> <li>• <b>gone for a walk during my lunch break</b></li> <li>• <b>had a walking meeting</b></li> <li>• <b>walked laps of the office to increase my movement</b></li> <li>• <b>participated in group physical activity sessions during work hours</b></li> </ul> | 2 = Rarely       |                     |
|                                                                                                                                                                                                                                                                                                                                                                                                                                                                                                                                                                                                                                                                                                                                                                                                                                                                                                                                                                                                                                                                                                                                                                                                                                                                                                                                                                | 3 = Sometimes    |                     |
|                                                                                                                                                                                                                                                                                                                                                                                                                                                                                                                                                                                                                                                                                                                                                                                                                                                                                                                                                                                                                                                                                                                                                                                                                                                                                                                                                                | 4 = Often        |                     |
|                                                                                                                                                                                                                                                                                                                                                                                                                                                                                                                                                                                                                                                                                                                                                                                                                                                                                                                                                                                                                                                                                                                                                                                                                                                                                                                                                                | 5 = Very often   |                     |

Q = questionnaire; BL = baseline; 3M = 3-month assessment; 12M = 12-month assessment

| Technology questions                                                                                                                                                                                          | Response options                                                                                                                                                             | Source        |
|---------------------------------------------------------------------------------------------------------------------------------------------------------------------------------------------------------------|------------------------------------------------------------------------------------------------------------------------------------------------------------------------------|---------------|
| <b>Q1 What technology do you own or have daily access to?</b>                                                                                                                                                 | Multiple choice of: <ul style="list-style-type: none"> <li>• Smartphone</li> <li>• iPad or tablet</li> <li>• Laptop or Personal Computer</li> <li>• None of these</li> </ul> | Q BL, 3M      |
| <b>Q2 How confident are you with a smartphone?</b><br><i>*Only asked this question if the following conditions are met:</i><br><i>Answer was at question 1 'smartphone'</i>                                   | 1 = Not at all confident<br>2 = Slightly confident<br>3 = Confident<br>4 = Very confident<br>5 = Extremely confident                                                         | Q BL, 3M      |
| <b>Q3 How confident are you with an iPad or tablet?</b><br><i>*Only asked this question if the following conditions are met:</i><br><i>Answer was at question 1 'iPad or tablet'</i>                          | 1 = Not at all confident<br>2 = Slightly confident<br>3 = Confident<br>4 = Very confident<br>5 = Extremely confident                                                         | Q BL, 3M      |
| <b>Q4 How confident are you with a laptop or personal computer?</b><br><i>*Only asked this question if the following conditions are met:</i><br><i>Answer was at question 1 'laptop or personal computer'</i> | 1 = Not at all confident<br>2 = Slightly confident<br>3 = Confident<br>4 = Very confident<br>5 = Extremely confident                                                         | Q BL, 3M      |
| <b>Q5 Have you used any other apps or wearable devices to help you be more active?</b>                                                                                                                        | 1 = Yes<br>2 = No                                                                                                                                                            | Q BL, 3M, 12M |
| <b>Q6 Please list all the apps and devices you have used to be more active:</b>                                                                                                                               | text                                                                                                                                                                         | Q BL, 3M, 12M |

Q = questionnaire; BL = baseline; 3M = 3-month assessment; 12M = 12-month assessment

| Musculoskeletal items                                                                                                                                                                                     | Response options                                                                                              | Source              |
|-----------------------------------------------------------------------------------------------------------------------------------------------------------------------------------------------------------|---------------------------------------------------------------------------------------------------------------|---------------------|
| <b>Q1 Have you at any time during the LAST 1 MONTH had trouble (such as ache, pain, discomfort, numbness) in [body part]?</b><br>(if yes asked Qs 2-4)                                                    | 1 = No<br>2 = Yes                                                                                             | Q BL,<br>3M,<br>12M |
| <b>Q2 How many days have you had trouble in your [body part] during the last 1 month?</b>                                                                                                                 | 1 = 0 days<br>2 = 1-7 days<br>3 = 8-30 days<br>4 = everyday                                                   | Q BL,<br>3M,<br>12M |
| <b>Q3 On average, how intense was your pain in your [body part] during the last 1 month on a 0-9 scale? (where 0 means no complaints and 9 means pain as bad as it can be)</b>                            | 0-9 scale                                                                                                     | Q BL,<br>3M,<br>12M |
| <b>Q4 Have you during the last 1 month been prevented from carrying out normal activities (e.g. job, housework, hobbies) because of trouble from your [body part]?</b>                                    | 1 = No<br>2 = Yes                                                                                             | Q BL,<br>3M,<br>12M |
| Asked for each body part including:<br><b>Neck, shoulders, elbows, wrists/hands, upper back, lower back (small of back), one or both hips/thighs/buttocks, one or both knees, one or both ankles/feet</b> |                                                                                                               |                     |
| <b>For shoulders, elbows and wrists/hands</b><br><b>Q1 is instead:</b>                                                                                                                                    | 1 = No<br>2 = Yes, but only in the right side<br>3 = Yes, but only in the left side<br>4 = Yes, in both sides |                     |
